# Supplementary material for: Representation of investigation results of microplastics on sandy beaches—accumulation rate and abundance in the entire study site
Source: PeerJ. 2024 Apr 10;12:e17207. doi: 10.7717/peerj.17207 (PMC11015833; doi:10.7717/peerj.17207)
Supplement: Supplemental Information 1 [file peerj-12-17207-s001.xlsx]

## Sheet: fig7-9
HS
		4					1				2
	20220914B		mg-MPs /m2-sand			20221005C				20221207D
	HS		B-HS			HS		C-HS		HS		D-HS
	20220914-HD-H01	0.8	3397			20221005-TM-H01	1.8	4919.3		20221207-GT-H01	2.8	35395.3
	20220914-HD-H02	0.9	1858.4			20221005-TM-H02	1.9	6418.6		20221207-GT-H02	2.9	15998.7
	20220914-HD-H03	1	4789.5			20221005-TM-H03	2	4158.9		20221207-GT-H03	3	45279.3
	20220914-HD-H04	1.1	543.9			20221005-TM-H04	2.1	4251.1		20221207-GT-H04	3.1	40090.5
	20220914-HD-H05	1.2	1389.4			20221005-TM-H05	2.2	10977.7		20221207-GT-H05	3.2	2521.3
	20220914-HD-H06	0.8	262.3			20221005-TM-H06	1.8	5013.5		20221207-GT-H06	2.8	640.8
	20220915-HD-H07	0.9	359.1			20221006-TM-H07	1.9	1345.9		20221207-GT-H07	2.9	559.9
	20220915-HD-H08	1	5964.4			20221006-TM-H08	2	5729.1		20221207-GT-H08	3	753.2
	20220915-HD-H09	1.1	969.4			20221006-TM-H09	2.1	1531.1		20221207-GT-H09	3.1	1207.1
	20220915-HD-H10	1.2	1282.4			20221006-TM-H10	2.2	755.8		20221207-GT-H10	3.2	1513.7
	20220915-HD-H11	0.8	4964			20221006-TM-H11	1.8	659.1		20221207-GT-H11	2.8	429.8
	20220915-HD-H12	0.9	1340.2			20221006-TM-H12	1.9	2260.2		20221207-GT-H12	2.9	1263.5
	nHS		B-nHS			nHS		C-nHS		nHS		D-nHS
	20220914-HD-N01	4.8	13			20221005-TM-N01	5.8	13		20221207-GT-N01	6.8	220.5
	20220914-HD-N02	4.9	13			20221005-TM-N02	5.9	26.4		20221207-GT-N02	6.9	64.7
	20220914-HD-N03	5	13			20221005-TM-N03	6	13		20221207-GT-N03	7	435.6
	20220914-HD-N04	5.1	108.7			20221005-TM-N04	6.1	50.5		20221207-GT-N04	7.1	13
	20220914-HD-N05	5.2	32.7			20221005-TM-N05	6.2	29.4		20221207-GT-N05	7.2	48.4
	20220914-HD-N06	4.8	13			20221005-TM-N06	5.8	32.6		20221207-GT-N06	6.8	13
	20220915-HD-N07	4.9	13			20221006-TM-N07	5.9	71.6		20221207-GT-N07	6.9	19.3
	20220915-HD-N08	5	13			20221006-TM-N08	6	13		20221207-GT-N08	7	62.4
	20220915-HD-N09	5.1	88.8			20221006-TM-N09	6.1	13		20221207-GT-N09	7.1	68.1
	20220915-HD-N10	5.2	13			20221006-TM-N10	6.2	13		20221207-GT-N10	7.2	21.6
	20220915-HD-N11	4.8	13			20221006-TM-N11	5.8	13		20221207-GT-N11	6.8	48.4
	20220915-HD-N12	4.9	215.2			20221006-TM-N12	5.9	13		20221207-GT-N12	6.9	191.9
			B-ave					C-ave				D-ave
Average	HS	1	2260				2	4001.69			3	12137.8
	nHS	5	45.7833				6	25.125			7	100.575
Standard deviation	HS		1992.28					2974.76				17610.8
	nHS		62.726					18.8504				125.187
	m	mg-MPs/m2-sand			1/m
	Distance	HS	nHS	HS/nHS	HS1	HS2
	2.02048	35395.3	220.5	160.523	79.448
	2.92727	15998.7	64.7	247.275	84.4728
	1.45216	45279.3	435.6	103.947	71.5809
	4.5841	40090.5	13	3083.88	672.735
	2.37242	2521.3	48.4	52.093		21.9577
	1.41645	640.8	13	49.2923		34.7998
	2.84949	559.9	19.3	29.0104		10.1809
	1.70642	753.2	62.4	12.0705		7.07361
	2.06593	1207.1	68.1	17.7254		8.57986
	1.3019	1513.7	21.6	70.0787		53.8281
	1.51702	429.8	48.4	8.88017		5.85369
	3.84152	1263.5	191.9	6.58416		1.71394

## Sheet: fig8
Fixed spot
Beach A				Day	2021-07-27	2021-09-22	2021-11-24	2022-05-11	2022-08-24	2022-11-01
				Elapsed day	0	57	120	288	393	462
		Content		4	127.2	85.1	45.1	68.2	27.7	203.2
		mg-MPs/m2-sand	m	8	13	112	279.1	13	751.2	93.5
				12	13	14.8	19.8	13	51.6	23.1
				16	13	141.7	13	13	18.2	13
				20	13	13	13	16.6	13	13
				40				13	13	13
		Accumulation rate		4		1.49298	0.715873	0.405952	0.26381	2.94493
		mg-MPs/(m2-sand·d)	m	8		1.96491	4.43016	0.1	7.15429	1.35507
				12		0.259649	0.314286	0.1	0.491429	0.334783
				16		2.48596	0.1	0.1	0.173333	0.1
				20		0.1	0.1	0.1	0.1	0.1
				40				0.1	0.1	0.1

## Sheet: fig10
Logistic regression analysis
		P = 1/{1+exp{-(β0*1+β1x1)}						http://aoki2.si.gunma-u.ac.jp/JavaScript/fit-logistic01.html
			β0	β1	P
		partial regression coefficients	-33.291	0.137832				Y = 1/{1+a*exp(-b*X)} Marquardt
								a: 2.8714485655004e+14
			1	x1				b: 0.13783245472548											Regression curve
				mg-MP/m2	HS:1, nHS:0			sum of squared residuals: 1.006897041200						Conc.	Judge				Conc.	Judge
			Constant	Conc.	Judge	Estimation		a	287144856550040						B	C	D			Regression curve
HS	1	20220914-HD-H01	1	3397	1	1		b	0.137832					3397	1				0	3.48256e-15
	2	20220914-HD-H02	1	1858.4	1	1		a = exp(-β0)						1858.4	1				10	1.38197e-14
	3	20220914-HD-H03	1	4789.5	1	1		β0 = -ln(a)						4789.5	1				20	5.48399e-14
	4	20220914-HD-H04	1	543.9	1	1								543.9	1				30	2.17618e-13
	5	20220914-HD-H05	1	1389.4	1	1								1389.4	1				40	8.63563e-13
	6	20220914-HD-H06	1	262.3	1	0.945958								262.3	1				50	3.42683e-12
	7	20220915-HD-H07	1	359.1	1	1								359.1	1				60	1.35985e-11
	8	20220915-HD-H08	1	5964.4	1	1								5964.4	1				70	5.39623e-11
	9	20220915-HD-H09	1	969.4	1	1								969.4	1				80	2.14136e-10
	10	20220915-HD-H10	1	1282.4	1	1								1282.4	1				90	8.49743e-10
	11	20220915-HD-H11	1	4964	1	1								4964	1				100	3.37199e-09
	12	20220915-HD-H12	1	1340.2	1	1								1340.2	1				110	1.33809e-08
	13	20221005-TM-H01	1	4919.3	1	1								4919.3		1			120	5.30987e-08
	14	20221005-TM-H02	1	6418.6	1	1								6418.6		1			130	2.10709e-07
	15	20221005-TM-H03	1	4158.9	1	1								4158.9		1			140	8.36144e-07
	16	20221005-TM-H04	1	4251.1	1	1								4251.1		1			150	3.31802e-06
	17	20221005-TM-H05	1	10977.7	1	1								10977.7		1			160	1.31666e-05
	18	20221005-TM-H06	1	5013.5	1	1								5013.5		1			170	5.22462e-05
	19	20221006-TM-H07	1	1345.9	1	1								1345.9		1			180	0.000207294
	20	20221006-TM-H08	1	5729.1	1	1								5729.1		1			190	0.000822087
	21	20221006-TM-H09	1	1531.1	1	1								1531.1		1			200	0.0032543
	22	20221006-TM-H10	1	755.8	1	1								755.8		1			210	0.0127903
	23	20221006-TM-H11	1	659.1	1	1								659.1		1			220	0.0488988
	24	20221006-TM-H12	1	2260.2	1	1								2260.2		1			230	0.169448
	25	20221207-GT-H01	1	35395.3	1	1								35395.3			1		240	0.447391
	26	20221207-GT-H02	1	15998.7	1	1								15998.7			1		250	0.762621
	27	20221207-GT-H03	1	45279.3	1	1								45279.3			1		260	0.927266
	28	20221207-GT-H04	1	40090.5	1	1								40090.5			1		270	0.980616
	29	20221207-GT-H05	1	2521.3	1	1								2521.3			1		280	0.995043
	30	20221207-GT-H06	1	640.8	1	1								640.8			1		290	0.998746
	31	20221207-GT-H07	1	559.9	1	1								559.9			1		300	0.999684
	32	20221207-GT-H08	1	753.2	1	1								753.2			1		310	0.99992
	33	20221207-GT-H09	1	1207.1	1	1								1207.1			1		320	0.99998
	34	20221207-GT-H10	1	1513.7	1	1								1513.7			1		330	0.999995
	35	20221207-GT-H11	1	429.8	1	1								429.8			1		340	0.999999
	36	20221207-GT-H12	1	1263.5	1	1								1263.5			1		350	1
nHS	37	20220914-HD-N01	1	13	0	2.08967e-14								13	0				360	1
	38	20220914-HD-N02	1	13	0	2.08967e-14								13	0				370	1
	39	20220914-HD-N03	1	13	0	2.08967e-14								13	0				380	1
	40	20220914-HD-N04	1	108.7	0	1.11858e-08								108.7	0				390	1
	41	20220914-HD-N05	1	32.7	0	3.15731e-13								32.7	0				400	1
	42	20220914-HD-N06	1	13	0	2.08967e-14								13	0				410	1
	43	20220915-HD-N07	1	13	0	2.08967e-14								13	0				420	1
	44	20220915-HD-N08	1	13	0	2.08967e-14								13	0				430	1
	45	20220915-HD-N09	1	88.8	0	7.20204e-10								88.8	0				440	1
	46	20220915-HD-N10	1	13	0	2.08967e-14								13	0				450	1
	47	20220915-HD-N11	1	13	0	2.08967e-14								13	0				460	1
	48	20220915-HD-N12	1	215.2	0	0.0258447								215.2	0				470	1
	49	20221005-TM-N01	1	13	0	2.08967e-14								13		0			480	1
	50	20221005-TM-N02	1	26.4	0	1.32495e-13								26.4		0			490	1
	51	20221005-TM-N03	1	13	0	2.08967e-14								13		0			500	1
	52	20221005-TM-N04	1	50.5	0	3.67132e-12								50.5		0			510	1
	53	20221005-TM-N05	1	29.4	0	2.00345e-13								29.4		0			520	1
	54	20221005-TM-N06	1	32.6	0	3.11409e-13								32.6		0			530	1
	55	20221006-TM-N07	1	71.6	0	6.72769e-11								71.6		0			540	1
	56	20221006-TM-N08	1	13	0	2.08967e-14								13		0			550	1
	57	20221006-TM-N09	1	13	0	2.08967e-14								13		0			560	1
	58	20221006-TM-N10	1	13	0	2.08967e-14								13		0			570	1
	59	20221006-TM-N11	1	13	0	2.08967e-14								13		0			580	1
	60	20221006-TM-N12	1	13	0	2.08967e-14								13		0			590	1
	61	20221207-GT-N01	1	220.5	0	0.0522054								220.5			0		600	1
	62	20221207-GT-N02	1	64.7	0	2.59916e-11								64.7			0		610	1
	63	20221207-GT-N03	1	435.6	0	1								435.6			0		620	1
	64	20221207-GT-N04	1	13	0	2.08967e-14								13			0		630	1
	65	20221207-GT-N05	1	48.4	0	2.74863e-12								48.4			0		640	1
	66	20221207-GT-N06	1	13	0	2.08967e-14								13			0		650	1
	67	20221207-GT-N07	1	19.3	0	4.9796e-14								19.3			0		660	1
	68	20221207-GT-N08	1	62.4	0	1.89302e-11								62.4			0		670	1
	69	20221207-GT-N09	1	68.1	0	4.15295e-11								68.1			0		680	1
	70	20221207-GT-N10	1	21.6	0	6.8371e-14								21.6			0		690	1
	71	20221207-GT-N11	1	48.4	0	2.74863e-12								48.4			0		700	1
	72	20221207-GT-N12	1	191.9	0	0.00106794								191.9			0		710	1
																			720	1
																			730	1
																			740	1
																			750	1
																			760	1
																			770	1
																			780	1
																			790	1
																			800	1
																			810	1
																			820	1
																			830	1
																			840	1
																			850	1
																			860	1
																			870	1
																			880	1
																			890	1
																			900	1
																			910	1
																			920	1
																			930	1
																			940	1
																			950	1
																			960	1
																			970	1
																			980	1
																			990	1
																			1000	1

## Sheet: tbl3
Average and error
	B	2022-09-14
												Average (a)	Error (b)	Area	Area ratio (c)	Weighted average	Error calculation
				mg/m2								C_ave	δC_ave	A	r	a×c	c2×b2
	HS	20220914-HD-H01		3397		α	0.05					mg-MPs/m2-sand	mg-MPs/m2-sand	m2-sand	‒	mg-MPs/m2-sand	‒
		20220914-HD-H02		1858.4		n	12				HS	2260	1265.84	532.578	0.113869	257.344	20776.2
		20220914-HD-H03		4789.5		Average	2260				nHS	45.7833	39.8542	4144.53	0.886131	40.57	31.2947
		20220914-HD-H04		543.9		Variance	3.9692e+06				Total			4677.11		297.914	20807.5
		20220914-HD-H05		1389.4		Standard error	575.123				Total error	δCall_ave	mg-MPs/m2-sand				144.248
		20220914-HD-H06		262.3		t	2.20099
		20220915-HD-H07		359.1		Error	1265.84
		20220915-HD-H08		5964.4
		20220915-HD-H09		969.4
		20220915-HD-H10		1282.4
		20220915-HD-H11		4964
		20220915-HD-H12		1340.2
	nHS	20220914-HD-N01		13		α	0.05
		20220914-HD-N02		13		n	12
		20220914-HD-N03		13		Average	45.7833
		20220914-HD-N04		108.7		Variance	3934.55
		20220914-HD-N05		32.7		Standard error	18.1074
		20220914-HD-N06		13		t	2.20099
		20220915-HD-N07		13		Error	39.8542
		20220915-HD-N08		13
		20220915-HD-N09		88.8
		20220915-HD-N10		13
		20220915-HD-N11		13
		20220915-HD-N12		215.2
	C	2022-10-05
												Average (a)	Error (b)	Area	Area ratio (c)	Weighted average	Error calculation
				mg/m2								C_ave	δC_ave	A	r	a×c	c2×b2
	HS	20221005-TM-H01		4919.3		α	0.05					mg-MPs/m2-sand	mg-MPs/m2-sand	m2-sand	‒	mg-MPs/m2-sand	‒
		20221005-TM-H02		6418.6		n	12				HS	4001.69	1890.07	408.854	0.274163	1097.11	268518
		20221005-TM-H03		4158.9		Average	4001.69				nHS	25.125	11.977	1082.43	0.725837	18.2367	6.30994
		20221005-TM-H04		4251.1		Variance	8.84921e+06				Total			1491.28		1115.35	268525
		20221005-TM-H05		10977.7		Standard error	858.74				Total error	δCall_ave	mg-MPs/m2-sand				518.194
		20221005-TM-H06		5013.5		t	2.20099
		20221006-TM-H07		1345.9		Error	1890.07
		20221006-TM-H08		5729.1
		20221006-TM-H09		1531.1
		20221006-TM-H10		755.8
		20221006-TM-H11		659.1
		20221006-TM-H12		2260.2
	nHS	20221005-TM-N01		13		α	0.05
		20221005-TM-N02		26.4		n	12
		20221005-TM-N03		13		Average	25.125
		20221005-TM-N04		50.5		Variance	355.337
		20221005-TM-N05		29.4		Standard error	5.44163
		20221005-TM-N06		32.6		t	2.20099
		20221006-TM-N07		71.6		Error	11.977
		20221006-TM-N08		13
		20221006-TM-N09		13
		20221006-TM-N10		13
		20221006-TM-N11		13
		20221006-TM-N12		13
	D	2022-12-07
												Average (a)	Error (b)	Area	Area ratio (c)	Weighted average	Error calculation
				mg/m2								C_ave	δC_ave	A	r	a×c	c2×b2
	HS	20221005-TM-H01		35395.3		α	0.05					mg-MPs/m2-sand	mg-MPs/m2-sand	m2-sand	‒	mg-MPs/m2-sand	‒
		20221005-TM-H02		15998.7		n	12				HS	12137.8	11189.3	347.157	0.331459	4023.18	1.37553e+07
		20221005-TM-H03		45279.3		Average	12137.8				nHS	100.575	79.5399	700.201	0.668541	67.2385	35.5501
		20221005-TM-H04		40090.5		Variance	3.10139e+08				Total			1047.36		4090.41	1.37553e+07
		20221005-TM-H05		2521.3		Standard error	5083.79				Total error	δCall_ave	mg-MPs/m2-sand				3708.82
		20221005-TM-H06		640.8		t	2.20099
		20221006-TM-H07		559.9		Error	11189.3
		20221006-TM-H08		753.2
		20221006-TM-H09		1207.1
		20221006-TM-H10		1513.7
		20221006-TM-H11		429.8
		20221006-TM-H12		1263.5
				12137.8
				3.10139e+08
	nHS	20221005-TM-N01		220.5		α	0.05
		20221005-TM-N02		64.7		n	12
		20221005-TM-N03		435.6		Average	100.575
		20221005-TM-N04		13		Variance	15671.7
		20221005-TM-N05		48.4		Standard error	36.1383
		20221005-TM-N06		13		t	2.20099
		20221006-TM-N07		19.3		Error	79.5399
		20221006-TM-N08		62.4
		20221006-TM-N09		68.1
		20221006-TM-N10		21.6
		20221006-TM-N11		48.4
		20221006-TM-N12		191.9
		平均		100.575
		分散		15671.7
	D	2022-12-07
												Average (a)	Error (b)	Area	Area ratio (c)	Weighted average	Error calculation
				mg/m2								C_ave	δC_ave	A	r	a×c	c2×b2
	HS1	20221005-TM-H01		35395.3		α	0.05					mg-MPs/m2-sand	mg-MPs/m2-sand	m2-sand	‒	mg-MPs/m2-sand	‒
		20221005-TM-H02		15998.7		n	4				HS1	34190.9	20339.6	115.522	0.110298	3771.2	5.03293e+06
		20221005-TM-H03		45279.3		Average	34190.9				HS2	1111.16	574.057	231.635	0.221161	245.746	28.0784
		20221005-TM-H04		40090.5		Variance	1.63388e+08				nHS	100.575	79.5399	700.201	0.668541	67.2385	35.5501
						Standard error	6391.17				Total			1047.36		4084.19	5.03299e+06
						t	3.18245				Total error	δCall_ave	mg-MPs/m2-sand				2243.43
						Error	20339.6
	HS2	20221005-TM-H05		2521.3		α	0.05
		20221005-TM-H06		640.8		n	8
		20221006-TM-H07		559.9		Average	1111.16
		20221006-TM-H08		753.2		Variance	471494
		20221006-TM-H09		1207.1		Standard error	242.769
		20221006-TM-H10		1513.7		t	2.36462
		20221006-TM-H11		429.8		Error	574.057
		20221006-TM-H12		1263.5
	nHS	20221005-TM-N01		220.5		α	0.05
		20221005-TM-N02		64.7		n	12
		20221005-TM-N03		435.6		Average	100.575
		20221005-TM-N04		13		Variance	15671.7
		20221005-TM-N05		48.4		Standard error	36.1383
		20221005-TM-N06		13		t	2.20099
		20221006-TM-N07		19.3		Error	79.5399
		20221006-TM-N08		62.4
		20221006-TM-N09		68.1
		20221006-TM-N10		21.6
		20221006-TM-N11		48.4
		20221006-TM-N12		191.9

## Sheet: tabl3-4
		Beach B
			Average (a)	Error (b)	Area	Area ratio (c)	Weighted average	Error calculation
			C_ave	δC_ave	A	r	a×c	c2×b2
			mg-MPs/m2-sand	mg-MPs/m2-sand	m2-sand	‒	mg-MPs/m2-sand	‒
		HS	2260	1265.84	532.578	0.113869	257.344	20776.2
		nHS	45.7833	39.8542	4144.53	0.886131	40.57	31.2947
		Total			4677.11		297.914	20807.5
		Total error	δCall_ave	mg-MPs/m2-sand				144.248
		Beach C
			Average (a)	Error (b)	Area	Area ratio (c)	Weighted average	Error calculation
			C_ave	δC_ave	A	r	a×c	c2×b2
			mg-MPs/m2-sand	mg-MPs/m2-sand	m2-sand	‒	mg-MPs/m2-sand	‒
		HS	4001.69	1890.07	408.854	0.274163	1097.11	268518
		nHS	25.125	11.977	1082.43	0.725837	18.2367	6.30994
		Total			1491.28		1115.35	268525
		Total error	δCall_ave	mg-MPs/m2-sand				518.194
		Beach D-1
			Average (a)	Error (b)	Area	Area ratio (c)	Weighted average	Error calculation
			C_ave	δC_ave	A	r	a×c	c2×b2
			mg-MPs/m2-sand	mg-MPs/m2-sand	m2-sand	‒	mg-MPs/m2-sand	‒
		HS	12137.8	11189.3	347.157	0.331459	4023.18	1.37553e+07
		nHS	100.575	79.5399	700.201	0.668541	67.2385	35.5501
		Total			1047.36		4090.41	1.37553e+07
		Total error	δCall_ave	mg-MPs/m2-sand				3708.82
		Beach D-2
			Average (a)	Error (b)	Area	Area ratio (c)	Weighted average	Error calculation
			C_ave	δC_ave	A	r	a×c	c2×b2
			mg-MPs/m2-sand	mg-MPs/m2-sand	m2-sand	‒	mg-MPs/m2-sand	‒
		HS1	34190.9	20339.6	115.522	0.110298	3771.2	5.03293e+06
		HS2	1111.16	574.057	231.635	0.221161	245.746	28.0784
		nHS	100.575	79.5399	700.201	0.668541	67.2385	35.5501
		Total			1047.36		4084.19	5.03299e+06
		Total error	δCall_ave	mg-MPs/m2-sand				2243.43
														Average	Error
														Call_ave	δCall_ave
													B	298	144
													C	1115	518
													D	4084	2243
															mg-MPs/m2-sand
